# Supplementary material for: SUMMER: a Mendelian randomization interactive server to systematically evaluate the causal effects of risk factors and circulating biomarkers on pan-cancer survival
Source: PubMed Central journal article supplement — Nucleic Acids Res. 2022 Aug 10;51(D1):D1160–7. doi: 10.1093/nar/gkac677 (PMC9825440; doi:10.1093/nar/gkac677), 2022-08-10
Supplement: gkac677_supplemental_file.pdf [file gkac677_supplemental_file.pdf]

## Supplementary Results

**Supplementary Table 1.** Summary of traits in the PheWAS database

| Category                | Trait                                                                                                               |
|-------------------------|---------------------------------------------------------------------------------------------------------------------|
| Anthropometric          | Standing height                                                                                                     |
| Anthropometric          | Birth weight                                                                                                        |
| Anthropometric          | Birth weight of first child                                                                                         |
| Anthropometric          | Sitting height ratio                                                                                                |
| Anthropometric          | Overweight                                                                                                          |
| Anthropometric          | Childhood obesity                                                                                                   |
| Anthropometric          | Body mass index (BMI)                                                                                               |
| Autoimmune/inflammatory | Celiac disease                                                                                                      |
| Autoimmune/inflammatory | Paget's disease                                                                                                     |
| Autoimmune/inflammatory | Non-cancer illness code, self-reported: asthma                                                                      |
| Autoimmune/inflammatory | Non-cancer illness code, self-reported: eczema/dermatitis                                                           |
| Autoimmune/inflammatory | Neuroblastoma                                                                                                       |
| Autoimmune/inflammatory | Multiple sclerosis                                                                                                  |
| Autoimmune/inflammatory | Systemic lupus erythematosus                                                                                        |
| Autoimmune/inflammatory | Rheumatoid arthritis                                                                                                |
| Behavioural             | Smoking status: Current                                                                                             |
| Behavioural             | Ever smoked                                                                                                         |
| Behavioural             | Number of cigarettes currently smoked daily (current cigarette smokers)                                             |
| Behavioural             | Risk taking                                                                                                         |
| Behavioural             | Sleep duration                                                                                                      |
| Behavioural             | Alcohol intake frequency.                                                                                           |
| Behavioural             | Past tobacco smoking                                                                                                |
| Behavioural             | Difficulty not smoking for 1 day                                                                                    |
| Behavioural             | Number of cigarettes previously smoked daily                                                                        |
| Behavioural             | Light smokers at least 100 smokes in lifetime                                                                       |
| Behavioural             | Smoking status: Previous                                                                                            |
| Behavioural             | Time from waking to first cigarette                                                                                 |
| Behavioural             | Chronotype                                                                                                          |
| Behavioural             | Morning/evening person (chronotype)                                                                                 |
| Behavioural             | Maternal smoking around birth                                                                                       |
| Behavioural             | Current tobacco smoking                                                                                             |
| Cardiovascular          | Blood clot DVT bronchitis emphysema asthma rhinitis eczema allergy diagnosed by doctor: Blood clot in the leg (DVT) |
| Cardiovascular          | Vascular/heart problems diagnosed by doctor: High blood pressure                                                    |
| Cardiovascular          | Diastolic blood pressure automated reading                                                                          |
| Cardiovascular          | Pulse rate                                                                                                          |
| Cardiovascular          | Systolic blood pressure automated reading                                                                           |
| Cardiovascular          | Blood clot DVT bronchitis emphysema asthma rhinitis eczema allergy diagnosed by doctor: Blood clot in the lung      |

---

|                |                                                                                                       |
|----------------|-------------------------------------------------------------------------------------------------------|
| Cardiovascular | Eye problems/disorders: Diabetes related eye disease                                                  |
| Cardiovascular | Diabetes diagnosed by doctor                                                                          |
| Cardiovascular | Vascular/heart problems diagnosed by doctor: Angina                                                   |
| Cardiovascular | Pulse rate automated reading                                                                          |
| Cardiovascular | Vascular/heart problems diagnosed by doctor: Heart attack                                             |
| ICD10 codes    | Diagnoses - main ICD10: M21 Other acquired deformities of limbs                                       |
| ICD10 codes    | Underlying (primary) cause of death: ICD10: J84.1 Other interstitial pulmonary diseases with fibrosis |
| ICD10 codes    | Diagnoses - main ICD10: B37 Candidiasis                                                               |
| ICD10 codes    | Diagnoses - main ICD10: S76 Injury of muscle and tendon at hip and thigh level                        |
| ICD10 codes    | Diagnoses - main ICD10: C44 Other malignant neoplasms of skin                                         |
| ICD10 codes    | Diagnoses - main ICD10: I21 Acute myocardial infarction                                               |
| ICD10 codes    | Diagnoses - main ICD10: R14 Flatulence and related conditions                                         |
| ICD10 codes    | Diagnoses - main ICD10: K76 Other diseases of liver                                                   |
| ICD10 codes    | Diagnoses - main ICD10: F43 Reaction to severe stress and adjustment disorders                        |
| ICD10 codes    | Diagnoses - main ICD10: K57 Diverticular disease of intestine                                         |
| ICD10 codes    | Diagnoses - main ICD10: N40 Hyperplasia of prostate                                                   |
| ICD10 codes    | Diagnoses - main ICD10: L03 Cellulitis                                                                |
| ICD10 codes    | Diagnoses - main ICD10: K80 Cholelithiasis                                                            |
| ICD10 codes    | Diagnoses - main ICD10: I25 Chronic ischaemic heart disease                                           |
| ICD10 codes    | Diagnoses - main ICD10: Z80 Family history of malignant neoplasm                                      |
| ICD10 codes    | Diagnoses - main ICD10: I20 Angina pectoris                                                           |
| ICD10 codes    | Diagnoses - main ICD10: I30 Acute pericarditis                                                        |
| ICD10 codes    | Underlying (primary) cause of death: ICD10: E85.4 Organ-limited amyloidosis                           |
| ICD10 codes    | Diagnoses - main ICD10: N20 Calculus of kidney and ureter                                             |
| ICD10 codes    | Diagnoses - main ICD10: D25 Leiomyoma of uterus                                                       |
| ICD10 codes    | Diagnoses - main ICD10: E04 Other non-toxic goitre                                                    |
| ICD10 codes    | Diagnoses - main ICD10: G56 Mononeuropathies of upper limb                                            |
| ICD10 codes    | Diagnoses - main ICD10: R31 Unspecified haematuria                                                    |
| ICD10 codes    | Diagnoses - main ICD10: J33 Nasal polyp                                                               |
| ICD10 codes    | Diagnoses - main ICD10: I83 Varicose veins of lower extremities                                       |
| ICD10 codes    | Diagnoses - main ICD10: I10 Essential (primary) hypertension                                          |
| ICD10 codes    | Diagnoses - main ICD10: M72 Fibroblastic disorders                                                    |
| ICD10 codes    | Diagnoses - main ICD10: K40 Inguinal hernia                                                           |
| ICD10 codes    | Diagnoses - main ICD10: I80 Phlebitis and thrombophlebitis                                            |
| ICD10 codes    | Diagnoses - main ICD10: N81 Female genital prolapse                                                   |
| ICD10 codes    | Diagnoses - main ICD10: H26 Other cataract                                                            |
| ICD10 codes    | Diagnoses - main ICD10: N19 Unspecified renal failure                                                 |
| ICD10 codes    | Diagnoses - main ICD10: O75 Other complications of labour and delivery not elsewhere classified       |
| ICD10 codes    | Diagnoses - main ICD10: I48 Atrial fibrillation and flutter                                           |

---

---

|               |                                                                                                                                                |
|---------------|------------------------------------------------------------------------------------------------------------------------------------------------|
| ICD10 codes   | Diagnoses - main ICD10: D12 Benign neoplasm of colon rectum anus and anal canal                                                                |
| Miscellaneous | Heel bone mineral density (BMD) T-score automated                                                                                              |
| Miscellaneous | Reason for glasses/contact lenses: For just reading/near work as you are getting older (called 'presbyopia')                                   |
| Miscellaneous | Qualifications: College or University degree                                                                                                   |
| Miscellaneous | Had menopause                                                                                                                                  |
| Miscellaneous | Qualifications: A levels/AS levels or equivalent                                                                                               |
| Miscellaneous | Overall health rating                                                                                                                          |
| Miscellaneous | Daytime dozing / sleeping (narcolepsy)                                                                                                         |
| Miscellaneous | Eye problems/disorders: Cataract                                                                                                               |
| Miscellaneous | Age at last live birth                                                                                                                         |
| Miscellaneous | Number of live births                                                                                                                          |
| Miscellaneous | Non-cancer illness code, self-reported: osteoarthritis                                                                                         |
| Miscellaneous | Hearing difficulty/problems with background noise                                                                                              |
| Miscellaneous | Zinc                                                                                                                                           |
| Miscellaneous | Chest pain or discomfort                                                                                                                       |
| Miscellaneous | Sodium in urine                                                                                                                                |
| Miscellaneous | Qualifications: CSEs or equivalent                                                                                                             |
| Miscellaneous | Handedness (chirality/laterality): Left-handed                                                                                                 |
| Miscellaneous | Iron                                                                                                                                           |
| Miscellaneous | Bring up phlegm/sputum/mucus on most days                                                                                                      |
| Miscellaneous | Wheeze or whistling in the chest in last year                                                                                                  |
| Miscellaneous | Mouth/teeth dental problems: Mouth ulcers                                                                                                      |
| Miscellaneous | Qualifications: Other professional qualifications eg: nursing teaching                                                                         |
| Miscellaneous | Other serious medical condition/disability diagnosed by doctor                                                                                 |
| Miscellaneous | Non-cancer illness code, self-reported: gout                                                                                                   |
| Miscellaneous | Forced vital capacity (FVC)                                                                                                                    |
| Miscellaneous | Age when periods started (menarche)                                                                                                            |
| Miscellaneous | Peak expiratory flow (PEF)                                                                                                                     |
| Miscellaneous | Mouth/teeth dental problems: Dentures                                                                                                          |
| Miscellaneous | Age at first live birth                                                                                                                        |
| Miscellaneous | Heel bone mineral density (BMD) T-score automated (right)                                                                                      |
| Miscellaneous | Ferritin                                                                                                                                       |
| Miscellaneous | Long-standing illness disability or infirmity                                                                                                  |
| Miscellaneous | Heel bone mineral density (BMD) T-score automated (left)                                                                                       |
| Miscellaneous | Eye problems/disorders: Glaucoma                                                                                                               |
| Miscellaneous | Qualifications: O levels/GCSEs or equivalent                                                                                                   |
| Miscellaneous | Reason for glasses/contact lenses: For short-sightedness i.e. only or mainly for distance viewing such as driving cinema etc (called 'myopia') |
| Miscellaneous | Hearing difficulty/problems: Yes                                                                                                               |
| Miscellaneous | Forced expiratory volume in 1-second (FEV1)                                                                                                    |
| Miscellaneous | Length of menstrual cycle                                                                                                                      |

---

---

|                          |                                                                                 |
|--------------------------|---------------------------------------------------------------------------------|
| Miscellaneous            | Started insulin within one year diagnosis of diabetes                           |
| Miscellaneous            | Doctor diagnosed hayfever or allergic rhinitis                                  |
| Miscellaneous            | Maximum heart rate during fitness test                                          |
| Non-cancer illness       | Non-cancer illness code self-reported: pulmonary embolism +/- dvt               |
| Non-cancer illness       | Non-cancer illness code self-reported: type 2 diabetes                          |
| Non-cancer illness       | Non-cancer illness code self-reported: deep venous thrombosis (dvt)             |
| Non-cancer illness       | Non-cancer illness code self-reported: hypertension                             |
| Non-cancer illness       | Number of self-reported non-cancer illnesses                                    |
| Non-cancer illness       | Non-cancer illness code self-reported: vitiligo                                 |
| Non-cancer illness       | Non-cancer illness code self-reported: migraine                                 |
| Non-cancer illness       | Non-cancer illness code self-reported: psoriasis                                |
| Non-cancer illness       | Non-cancer illness code self-reported: ankylosing spondylitis                   |
| Non-cancer illness       | Non-cancer illness code self-reported: polio / poliomyelitis                    |
| Non-cancer illness       | Non-cancer illness code self-reported: hypertrophic cardiomyopathy (hcm / hocm) |
| Non-cancer illness       | Non-cancer illness code self-reported: malabsorption/coeliac disease            |
| Non-cancer illness       | Non-cancer illness code self-reported: heart attack/myocardial infarction       |
| Non-cancer illness       | Non-cancer illness code self-reported: angina                                   |
| Non-cancer illness       | Non-cancer illness code self-reported: cholelithiasis/gall stones               |
| Non-cancer illness       | Non-cancer illness code self-reported: osteoporosis                             |
| Non-cancer illness       | Non-cancer illness code self-reported: hyperthyroidism/thyrototoxicosis         |
| Non-cancer illness       | Non-cancer illness code self-reported: kidney stone/ureter stone/bladder stone  |
| Non-cancer illness       | Non-cancer illness code self-reported: glaucoma                                 |
| Non-cancer illness       | Non-cancer illness code self-reported: pneumothorax                             |
| Non-cancer illness       | Non-cancer illness code self-reported: pernicious anaemia                       |
| Non-cancer illness       | Non-cancer illness code self-reported: high cholesterol                         |
| Non-cancer illness       | Non-cancer illness code self-reported: nasal polyps                             |
| Non-cancer illness       | Non-cancer illness code self-reported: hypopituitarism                          |
| Non-cancer illness       | Non-cancer illness code self-reported: enlarged prostate                        |
| Non-cancer illness       | Non-cancer illness code self-reported: uterine fibroids                         |
| Non-cancer illness       | Non-cancer illness code, self-reported: hypothyroidism/myxoedema                |
| Psychiatric/neurological | Putamen volume                                                                  |
| Psychiatric/neurological | Bulimia nervosa                                                                 |
| Psychiatric/neurological | PGC cross-disorder traits                                                       |
| Psychiatric/neurological | Suffer from 'nerves'                                                            |

---

**Supplementary Table 2.** Summary of cancer survival-associated risk loci.

| Cancer type       | Overall survival <sup>a</sup>                                                                                                                                                                                                                                                                                                        | Cancer-specific survival <sup>a</sup>                                                                                                                                                                                                                                                                                                               |
|-------------------|--------------------------------------------------------------------------------------------------------------------------------------------------------------------------------------------------------------------------------------------------------------------------------------------------------------------------------------|-----------------------------------------------------------------------------------------------------------------------------------------------------------------------------------------------------------------------------------------------------------------------------------------------------------------------------------------------------|
| Bladder cancer    | 1q23.3, 2q23.3, 3q21.2, 4q26, 5q33.3, 6q26, 7p21.3, 7q11.21, 8p23.1, 8q24.22, 9q32, 9q33.2, 10p12.2, 10q25.3, 10q26.13, 11q14.1, 12p13.31, 16q24.1, 17p13.1, 17q21.31, 17q23.3, 17q25.1, 18q21.33                                                                                                                                    | 1p22.3, 1q23.3, 1q32.1, 1q41, 2q11.2, 3p25.3, 3p12.3, 3q13.13, 3q21.2, 3q21.3, 4q22.1, 4q23, 4q25, 4q31.21, 5q22.3, 6q26, 7q11.21, 8p23.1, 8p22, 8q24.22, 9p22.1, 9q33.2, 9q34.3, 10p12.2, 10q11.23, 11p11.2, 12p13.31, 12p11.21, 13q32.2, 15q24.1, 16p13.3, 17p13.2, 17q21.31, 17q23.3, 17q25.1, 20p11.21, 20q13.2, 22q12.2                        |
| Brain cancer      | 1p36.11, 2p21, 2q31.3, 3p22.2, 3q13.11, 3q23, 4q13.2, 5p15.33, 5p15.1, 5q12.1, 5q21.3, 6q15, 6q24.2, 7q31.1, 8q12.1, 8q22.1, 9p24.1, 9q21.13, 9q22.1, 10p15.1, 11p15.1, 11q22.1, 12q13.3, 12q15, 12q24.23, 15q22.31, 15q26.2, 16p13.2, 16p13.13, 16q21, 16q22.2, 16q24.3, 17p13.1, 17p12, 17q25.1, 17q25.3, 18q12.3, 20q12, 20q13.33 | 1q25.3, 1q42.3, 1q43, 2p21, 2q31.3, 3p22.2, 3p12.3, 3q13.11, 3q23, 4p16.3, 4q13.2, 5p15.1, 5q12.1, 5q22.3, 6q15, 6q24.2, 7q31.1, 8q12.1, 8q22.1, 9p24.2, 9q21.13, 10p15.1, 11p15.1, 11p14.2, 11p12, 12q24.23, 16p13.2, 16p13.13, 16q21, 16q22.2, 16q24.3, 17p13.1, 17p12, 17q25.1, 17q25.3, 18q12.3, 19p13.3, 20q12                                 |
| Breast cancer     | 2p25.1, 3p26.1, 3q13.32, 6q23.2, 7p21.3, 8q23.2, 10q23.31, 13q33.1, 15q11.2, 15q23, 16p13.11, 16p11.2, 17q25.1, 18p11.32, 22q12.3                                                                                                                                                                                                    | 1q24.1, 2p14, 4p12, 4q28.3, 5q14.3, 7p21.3, 8q23.2, 9q21.31, 10q11.21, 12q15, 15q23, 16p13.11                                                                                                                                                                                                                                                       |
| Colorectal cancer | 1q44, 2p22.3, 8q24.23, 10q25.1, 21q22.2                                                                                                                                                                                                                                                                                              | 1p31.3, 3p13, 4q28.1, 10p12.31, 10q25.1, 17q21.33, 17q23.3                                                                                                                                                                                                                                                                                          |
| Corpus Uteri      | 1q31.3, 1q42.2, 2p25.3, 2p22.1, 2p14, 2q12.2, 2q31.2, 3p24.3, 3q13.2, 3q26.31, 4p12, 4q24, 4q32.1, 4q35.1, 4q35.2, 5q12.3, 6p22.1, 6p21.33, 7p14.3, 7q35, 8q24.21, 9q33.1, 10p11.21, 10q25.2, 11p14.3, 11p12, 12p13.33, 14q32.2, 15q13.2, 15q22.2, 16p11.2, 16q23.1, 17p13.3, 20q13.2, 21q21.1                                       | 1q31.3, 1q42.2, 2p22.1, 3p21.1, 3q11.2, 3q13.2, 3q26.31, 4p16.3, 4q24, 4q32.1, 4q35.1, 5q12.3, 7p12.2, 7q11.23, 8q21.13, 9q33.1, 10p11.21, 12p12.3, 12q13.13, 12q24.13, 12q24.32, 13q12.13, 13q21.1, 14q32.11, 14q32.2, 15q26.1, 16p13.3, 16q23.1, 17q24.3, 18p11.21, 19p12                                                                         |
| Esophagus cancer  | 1p36.13, 1p35.2, 1p31.3, 1q31.2, 2q32.3, 2q35, 2q37.1, 3q21.3, 3q26.32, 3q27.3, 4q12, 4q13.1, 5q23.1, 6p25.1, 6q25.3, 7p12.3, 7q11.23, 7q21.12, 8p23.2, 8p23.1, 8p21.2, 8p12, 8q24.12, 8q24.21, 9p24.3, 10p15.1, 10q25.3, 11p12, 11q24.1, 11q25, 12q23.3, 12q24.11, 13q33.1, 18q12.1, 20q13.2, 22q11.23                              | 1p36.32, 1p36.13, 1p31.3, 1q21.3, 2q35, 3q21.3, 3q25.33, 3q26.32, 3q27.3, 4q34.3, 5p14.1, 6p12.2, 7q11.22, 7q11.23, 7q21.3, 7q22.1, 7q22.3, 8p11.21, 8q12.1, 9p24.1, 10p15.1, 10q21.2, 10q25.3, 11q25, 12q15, 12q23.3, 12q24.11, 13q33.1, 17p11.2, 18q11.2, 18q21.31                                                                                |
| Gastric cancer    | 1p36.32, 1p36.12, 1p34.1, 1q41, 1q43, 2p24.3, 2p23.3, 2p14, 2q11.2, 2q12.2, 2q12.3, 2q13, 2q24.2, 3p21.1, 3q21.1, 3q22.1, 3q29, 4p15.31, 4p12, 4q28.1, 4q32.1, 5q22.2, 7p21.3, 7p15.2, 9p21.3, 9q33.1, 10p13, 10p12.31, 10q22.3, 10q23.1, 10q23.31, 10q26.3, 11q12.3, 11q24.1, 11q24.2, 12q14.1, 12q24.32, 15q21.1, 15q21.3,         | 1p36.32, 1p13.1, 1q23.2, 1q24.2, 1q31.3, 1q42.13, 1q43, 2p21, 2p14, 2q33.1, 2q37.1, 3p22.3, 3q12.1, 3q21.1, 4p15.31, 4p11, 4q13.2, 4q25, 4q26, 4q28.1, 5q22.2, 5q22.3, 6p25.3, 6p22.3, 6p12.2, 6p12.1, 6q11.1, 7p21.1, 7p11.2, 7q35, 8p21.3, 9p21.3, 9p13.2, 9q32, 10p13, 10q21.3, 10q23.2, 11p14.1, 11q22.1, 11q24.1, 12q24.21, 13q21.33, 13q31.3, |

|                         |                                                                                                                                                                                                                                                                                                                                                                                                                                                                                         |                                                                                                                                                                                                                                                                                                                                                                                                  |
|-------------------------|-----------------------------------------------------------------------------------------------------------------------------------------------------------------------------------------------------------------------------------------------------------------------------------------------------------------------------------------------------------------------------------------------------------------------------------------------------------------------------------------|--------------------------------------------------------------------------------------------------------------------------------------------------------------------------------------------------------------------------------------------------------------------------------------------------------------------------------------------------------------------------------------------------|
|                         | 15q22.2, 15q26.2, 16p13.12, 17p11.1, 17q11.1, 17q24.3, 18q21.31, 18q21.33, 19p13.3, 20p11.23, 21q22.2                                                                                                                                                                                                                                                                                                                                                                                   | 13q32.2, 13q33.1, 15q11.2, 15q26.2, 17p11.1, 17q11.1, 17q12, 18q21.31, 20q13.13, 20q13.33, 21q22.2                                                                                                                                                                                                                                                                                               |
| Lung cancer             | 3p14.2, 3p14.1, 4p15.2, 17p11.2                                                                                                                                                                                                                                                                                                                                                                                                                                                         | 1q31.2, 2p16.3, 2q12.3, 5q14.2, 5q14.3, 8q24.22, 9p13.3, 9q21.13, 14q12                                                                                                                                                                                                                                                                                                                          |
| Lymphoid Leukaemia      | 1p36.32, 1p36.13, 1p32.3, 1p32.2, 2q11.2, 2q22.1, 2q23.3, 2q24.1, 2q32.1, 3p22.2, 3p22.1, 3p14.1, 3p13, 3q12.1, 4p15.33, 4q13.2, 4q26, 4q35.1, 5p14.3, 5q23.1, 5q23.2, 5q32, 5q33.2, 5q33.3, 6p21.2, 6q13, 6q24.2, 7p21.1, 7p14.3, 7q31.1, 7q35, 8q22.1, 9q22.33, 9q34.13, 10p14, 10p12.2, 11p12, 11q13.2, 11q13.4, 11q14.1, 12p12.1, 14q13.1, 15q25.1, 15q25.3, 15q26.1, 15q26.2, 16p13.2, 17p13.2, 17q21.2, 17q25.3, 20p11.21, 20q13.13, 20q13.2, 20q13.31, 21q21.1, 21q21.2, 22q12.3 | 1p21.3, 1q25.3, 1q41, 2p24.2, 2q24.1, 3p24.2, 3p24.1, 3p22.1, 4p15.2, 4q24, 4q26, 4q35.1, 5p13.3, 5p13.1, 5q11.2, 5q23.1, 5q32, 5q33.2, 6p12.2, 7p12.3, 7q31.1, 8p23.1, 8q21.2, 8q21.3, 8q24.21, 10q11.23, 10q23.1, 14q32.11, 15q26.1, 15q26.2, 17q22, 18q22.3, 19q13.33, 19q13.42, 19q13.43, 20p11.21                                                                                           |
| Multiple Myeloma        | 1p36.13, 1p35.3, 2p23.2, 2p22.2, 2p21, 2p16.1, 2p14, 2p11.1, 2q22.1, 2q32.3, 2q35, 3p26.2, 3p24.1, 3q13.12, 4p14, 4q23, 5p15.2, 5q34, 6p25.3, 6p21.2, 6q15, 6q22.31, 6q22.33, 7q36.2, 8p22, 12p13.32, 12q15, 14q32.11, 14q32.33, 15q13.1, 15q25.1, 16p13.12, 16q23.1, 16q23.3, 18q12.2, 19p13.2, 20q11.21, 21q22.3, 22q13.1                                                                                                                                                             | 1p35.3, 1q31.1, 1q42.13, 2p23.2, 2p22.2, 2p21, 2p14, 2p11.1, 2q32.3, 2q33.3, 3p26.2, 3p24.1, 3q13.12, 3q27.2, 5p15.2, 5p13.1, 5q23.2, 5q34, 5q35.2, 6p21.2, 6q15, 6q22.31, 7q34, 7q36.2, 9p21.3, 9q21.31, 11p15.2, 11p11.2, 14q24.1, 14q32.33, 15q13.1, 15q25.1, 16q23.1, 16q23.2, 17p13.1, 18p11.23, 18q21.1, 18q23, 19p13.2, 21q22.3, 22q13.1                                                  |
| Oral and pharynx cancer | 1p31.3, 2p13.3, 2q12.1, 2q14.1, 2q14.3, 2q24.1, 2q32.1, 2q32.3, 3p14.3, 3q22.3, 3q28, 4q31.23, 4q31.3, 4q32.1, 4q32.3, 5q14.1, 5q23.3, 6p25.3, 6q16.1, 6q25.3, 8p22, 8p12, 8q21.3, 11q23.3, 11q24.1, 12q21.33, 16q12.2, 20q11.21, 20q12, 20q13.33                                                                                                                                                                                                                                       | 1q24.2, 1q31.3, 2p21, 2q14.3, 2q24.3, 2q32.1, 2q32.2, 3p14.3, 3p14.2, 3q28, 4q25, 4q32.3, 4q34.3, 5p15.1, 5q23.2, 6p21.31, 6q16.1, 7p21.1, 7p14.1, 8p23.1, 8p22, 8p11.23, 9q34.13, 9q34.3, 10q26.11, 11p11.2, 11q24.1, 13q31.3, 14q12, 14q13.1, 14q23.3, 15q13.3, 15q14, 16p12.3, 16q12.2, 17q25.3, 18q23, 19p13.12, 19q13.42                                                                    |
| Ovarian cancer          | 1p32.1, 1p22.3, 1q42.12, 2p12, 2q14.2, 2q31.1, 2q32.3, 2q33.2, 3p26.1, 3p14.1, 3p11.1, 3q12.1, 4q13.3, 4q24, 4q25, 4q34.2, 5p15.2, 5q12.3, 5q35.1, 5q35.3, 6q14.1, 7p15.3, 7p14.3, 7q21.11, 7q22.1, 8q21.12, 8q24.3, 9q21.12, 9q21.13, 9q22.33, 9q34.13, 10q21.1, 10q21.2, 10q23.1, 10q24.2, 11p15.4, 11q13.3, 11q14.1, 11q24.3, 12p13.32, 12q21.2, 13q31.3, 14q32.12, 14q32.2, 15q12, 16p13.13, 19p13.11, 22q13.33                                                                     | 1p32.1, 1p31.1, 1p22.3, 1q41, 1q43, 2q14.2, 2q24.3, 2q32.3, 2q33.1, 2q36.1, 3p26.1, 3p14.1, 3p11.1, 3q22.2, 4q13.3, 4q23, 5p15.2, 5q12.3, 6p24.3, 6q14.1, 7q21.11, 7q22.1, 8q21.12, 8q24.3, 9q21.12, 9q21.13, 9q22.33, 10q21.1, 10q23.1, 10q24.2, 10q26.3, 11p12, 11q13.3, 11q14.1, 11q24.3, 12q21.2, 13q12.13, 13q13.1, 14q24.1, 14q32.12, 15q12, 17p13.2, 17q21.2, 18q12.2, 19q13.11, 20q11.23 |

|                   |                                                                                                                                                                                        |                                                                                                                                                                                                                                |
|-------------------|----------------------------------------------------------------------------------------------------------------------------------------------------------------------------------------|--------------------------------------------------------------------------------------------------------------------------------------------------------------------------------------------------------------------------------|
| Pancreatic cancer | 1p31.1, 1q32.1, 1q41, 2p25.2, 2q14.3, 2q32.1, 3p11.1, 4p16.1, 4q28.3, 5p15.1, 8q24.13, 8q24.23, 9p21.3, 9p21.1, 10p13, 15q13.3, 15q22.31, 15q26.2, 17q21.2, 18p11.32, 18q12.2, 18q22.3 | 1q32.1, 1q41, 2q31.1, 2q32.1, 3p11.1, 3q26.32, 4p16.1, 5p15.1, 5q33.1, 7q21.11, 7q22.1, 8q24.13, 8q24.23, 9p21.1, 9q34.13, 10p13, 10q26.2, 11p15.4, 12p13.33, 12p13.31, 13q13.1, 13q14.3, 15q13.3, 15q22.31, 15q26.2, 18p11.32 |
| Prostate cancer   | 1q24.3, 2q32.1, 3q13.33, 3q25.1, 3q25.33, 4q13.3, 5p13.2, 11p12, 17p13.2, 17q24.2, 18q21.31                                                                                            | 2q13, 3q25.33, 4p12, 5p13.2, 5q31.3, 7p12.3, 10q11.23, 14q32.31, 17q24.2                                                                                                                                                       |
| Renal cancer      | 1q24.3, 1q32.3, 2p15, 2q24.2, 2q37.2, 3p11.1, 3q25.32, 6q16.1, 7q31.1, 8q22.3, 9q31.1, 11p13, 11q24.1, 12p12.3, 15q12, 16q12.1, 18p11.32                                               | 1p31.3, 1q32.1, 1q32.3, 2p15, 2q24.1, 2q24.2, 3p11.1, 3q25.32, 4p15.1, 4q25, 5p14.3, 5q35.3, 6p23, 7p21.3, 8p23.2, 9q21.33, 9q34.3, 11p14.3, 11q22.3, 12p13.33, 12q21.31, 13q21.1, 15q22.2, 19q13.31                           |
| Skin Melanoma     | 1q21.3, 1q23.3, 2q12.1, 2q31.3, 2q37.2, 3q13.12, 4q24, 5p15.2, 5q22.3, 5q33.2, 5q34, 7p14.1, 7q21.3, 9q33.3, 10p12.1, 10q23.2, 11p14.1, 11p13, 14q32.12, 19q13.41, 20q11.23, 22q12.3   | 1p34.1, 1q21.3, 2q12.1, 2q12.3, 2q31.3, 2q32.3, 3q21.3, 4q26, 4q31.21, 5p15.2, 5p14.1, 5q31.3, 5q32, 6p22.3, 7q31.33, 8p12, 10q23.2, 10q26.11, 11p12, 12q21.2, 12q24.31, 16q12.2, 16q22.1, 17q22, 19q13.32                     |
| Thyroid cancer    | 3p25.2, 3p11.1, 6q27, 12q14.1, 14q32.2, 18q21.32, 20q13.31                                                                                                                             | -                                                                                                                                                                                                                              |

<sup>a</sup> *P*-value for Cox regression model  $\leq 1 \times 10^{-6}$ .

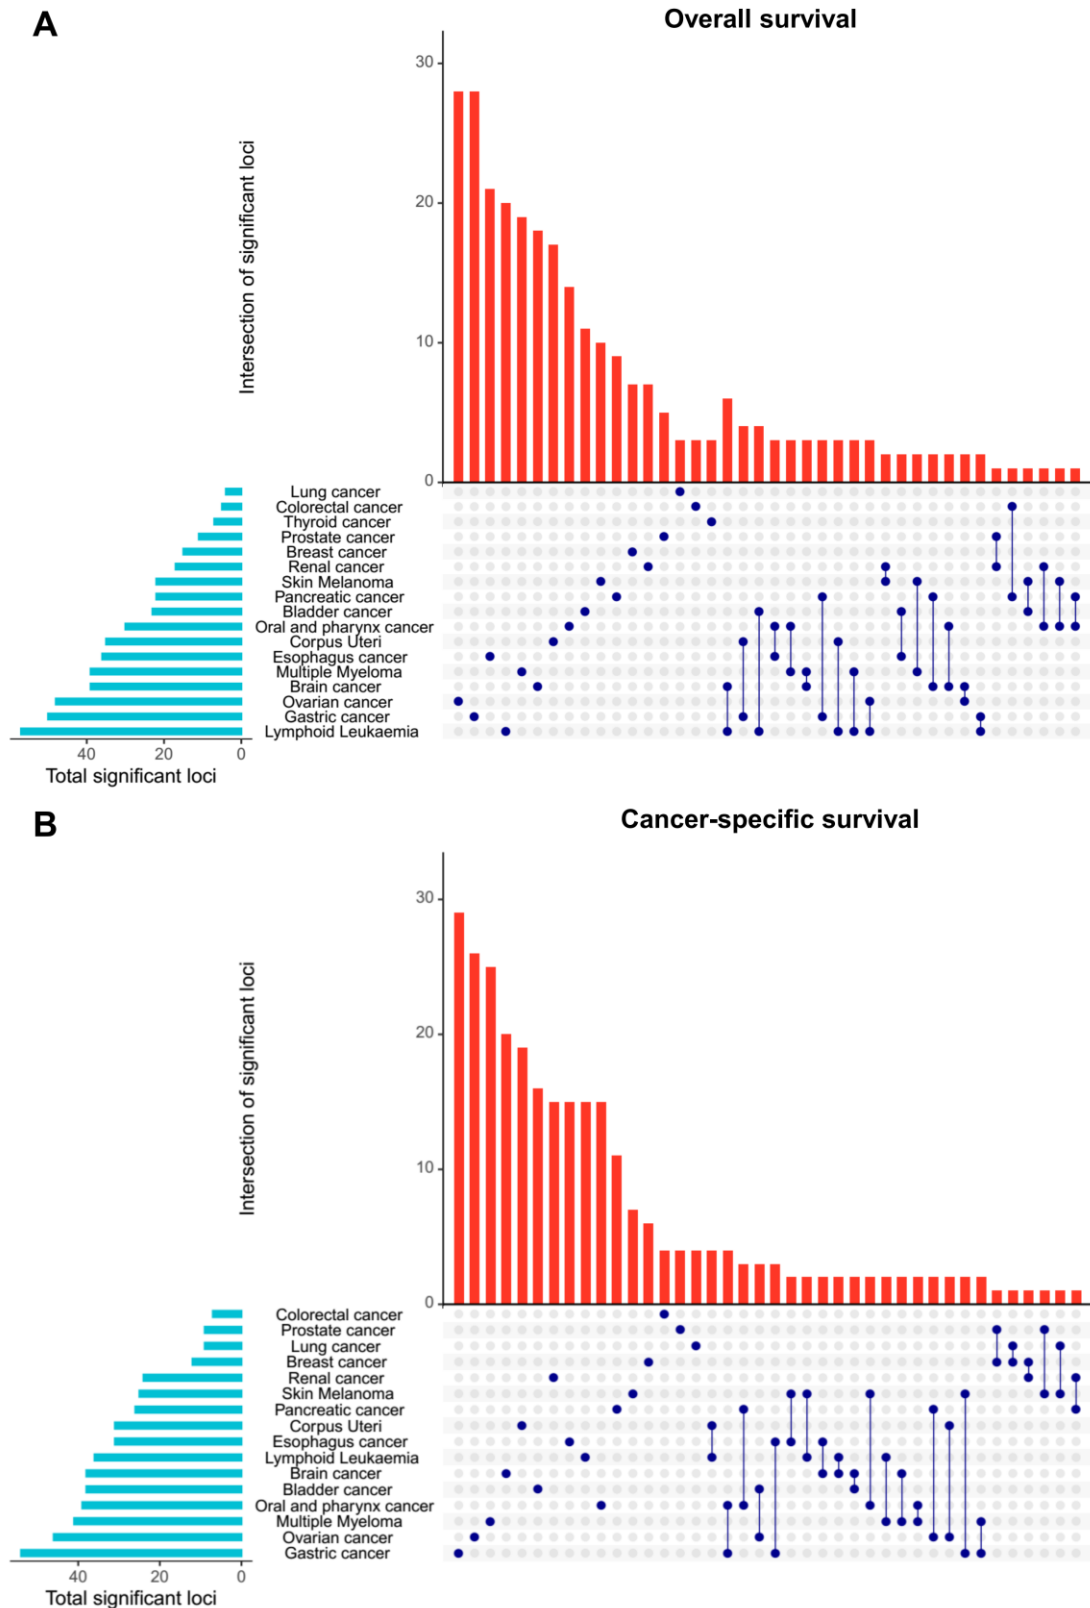

**Supplementary Figure 1.** Summary of the significant risk loci associated with cancer survival. (A) Overall survival; (B) cancer-specific survival. Risk loci identified in multiple cancer types were connected by lines.



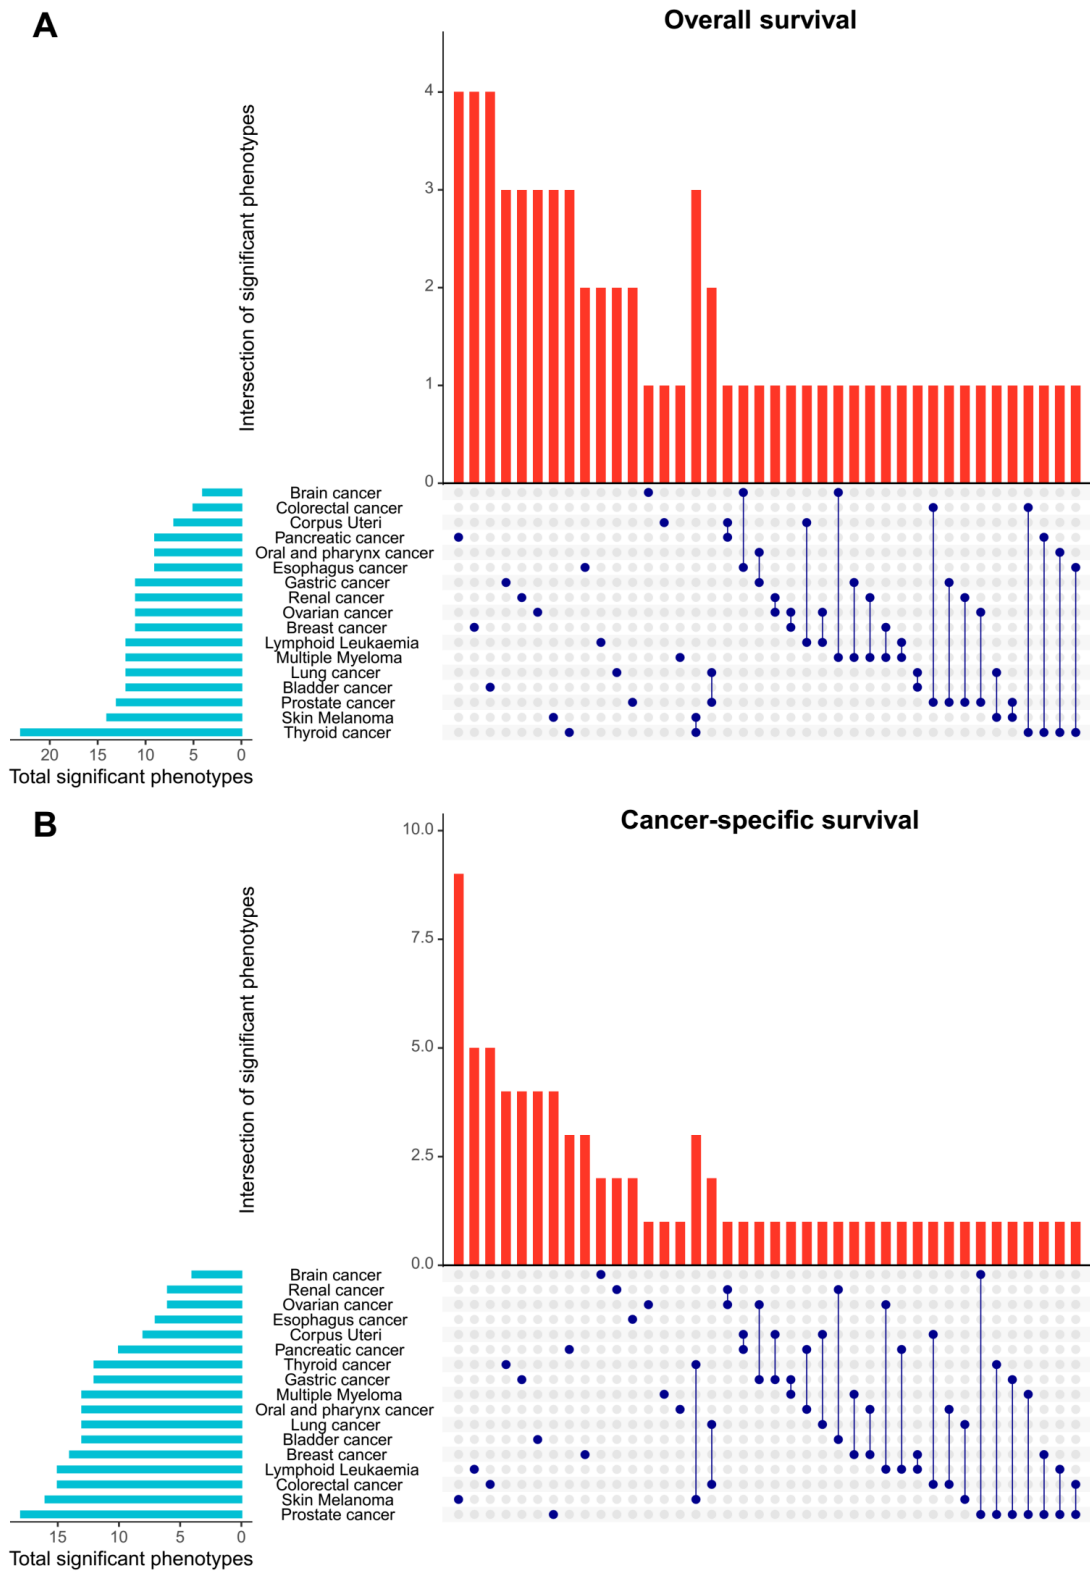

**Supplementary Figure 2.** Summary of the significant risk factors associated with cancer survival via Mendelian randomization (MR) analysis. (A) Overall survival; (B) cancer-specific survival. Risk factors identified in multiple cancer types were connected by lines.

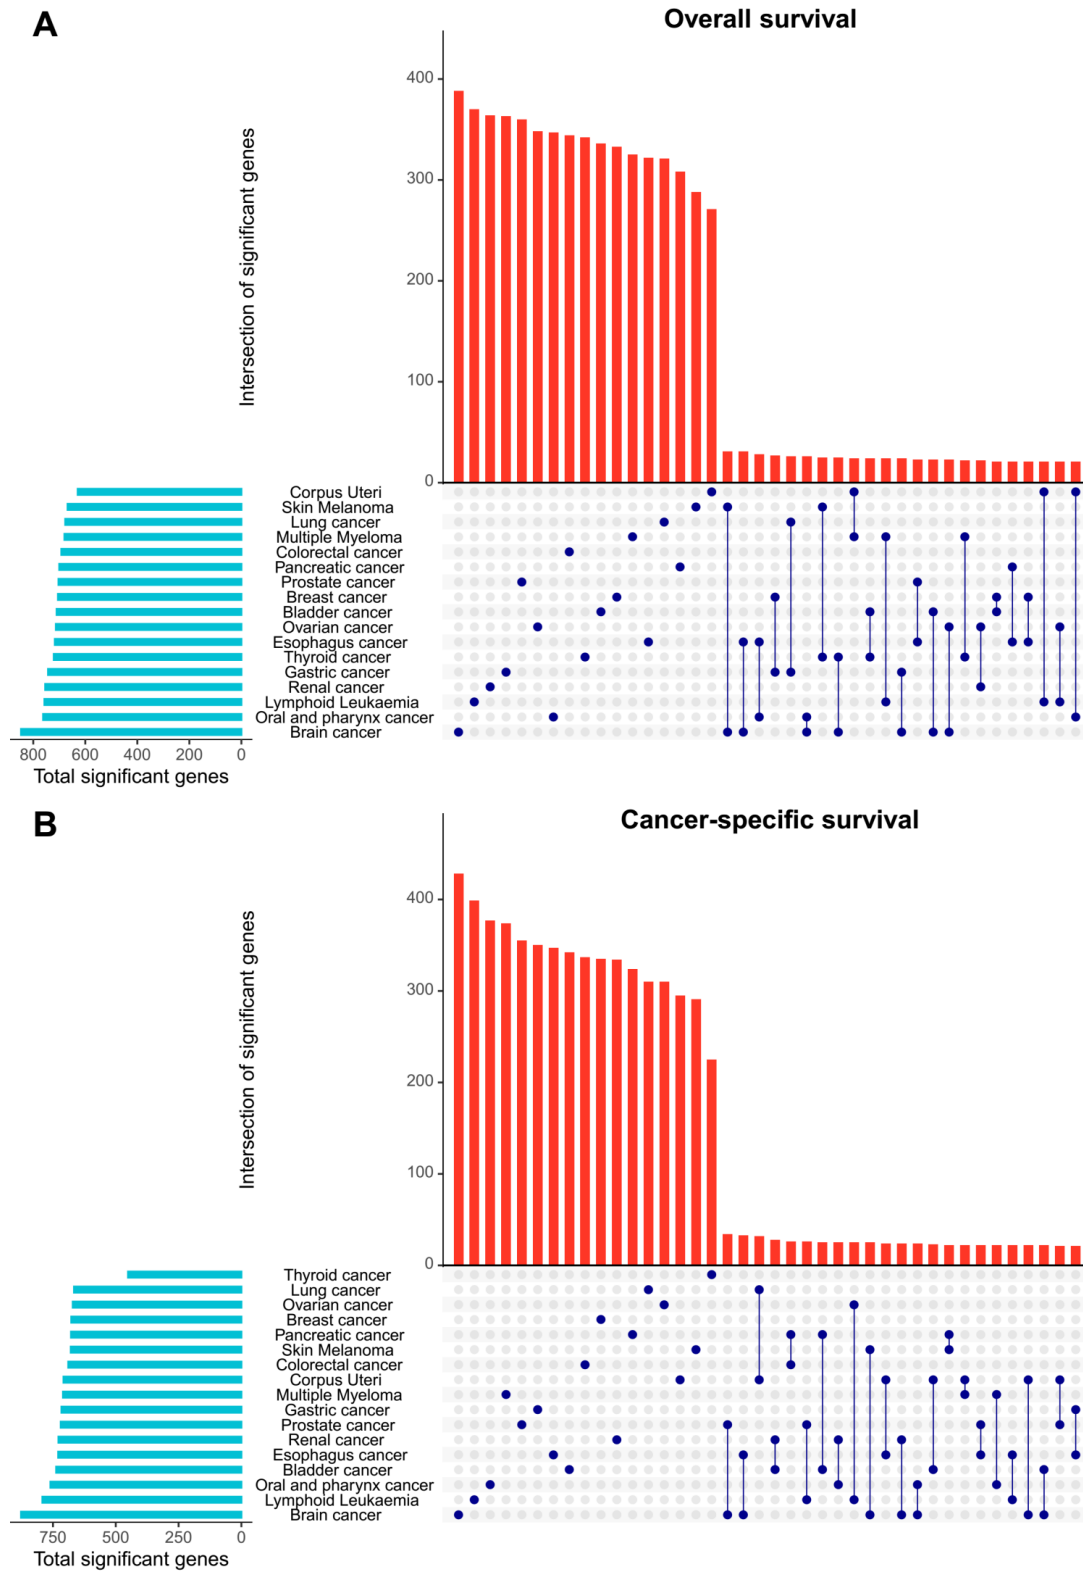

**Supplementary Figure 3.** Summary of the significant genes associated with cancer survival via Mendelian randomization (MR) analysis. (A) Overall survival; (B) cancer-specific survival. Genes identified in multiple cancer types were connected by lines.

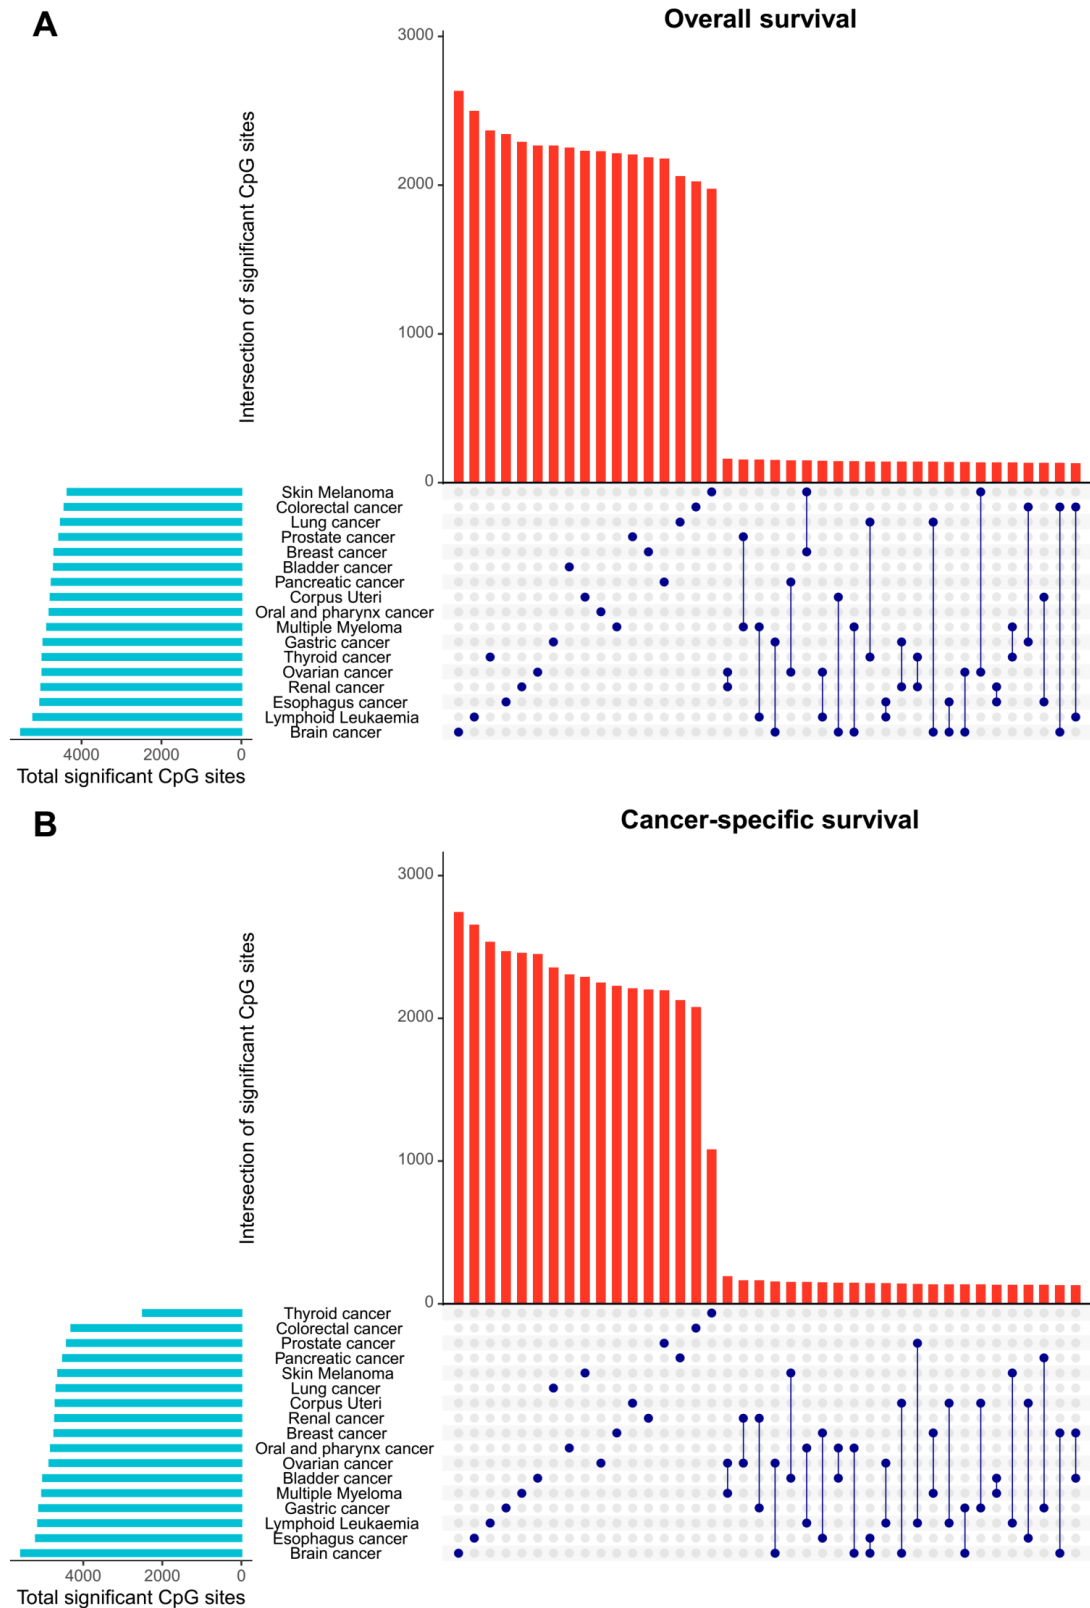

**Supplementary Figure 4.** Summary of the significant CpG sites associated with cancer survival via Mendelian randomization (MR) analysis. (A) Overall survival; (B) cancer-specific survival. CpG sites identified in multiple cancer types were connected by lines.
